# Supplementary material
Source: PubMed Central journal article supplement (PMC4187981)
Supplement: AAC.02834-14_zac010143343so1.pdf [file AAC.02834-14_zac010143343so1.pdf]

**Supplementary data**

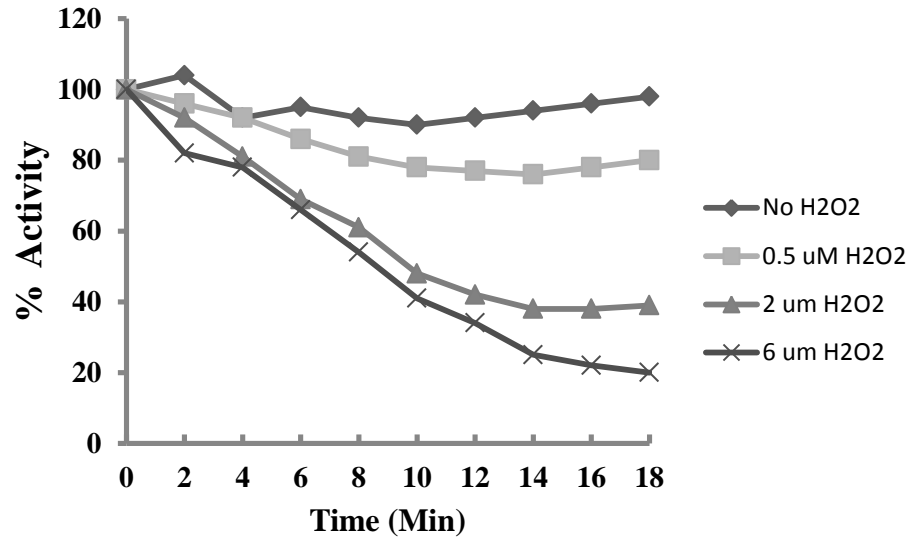

Fig S1: Activity of purified LdAPx against H<sub>2</sub>O<sub>2</sub>

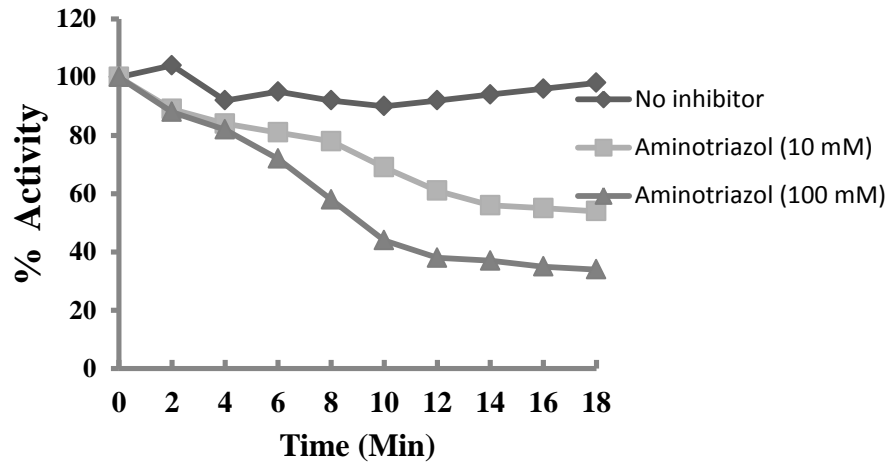

Fig S2: Activity of purified LdAPx against Aminotriazol

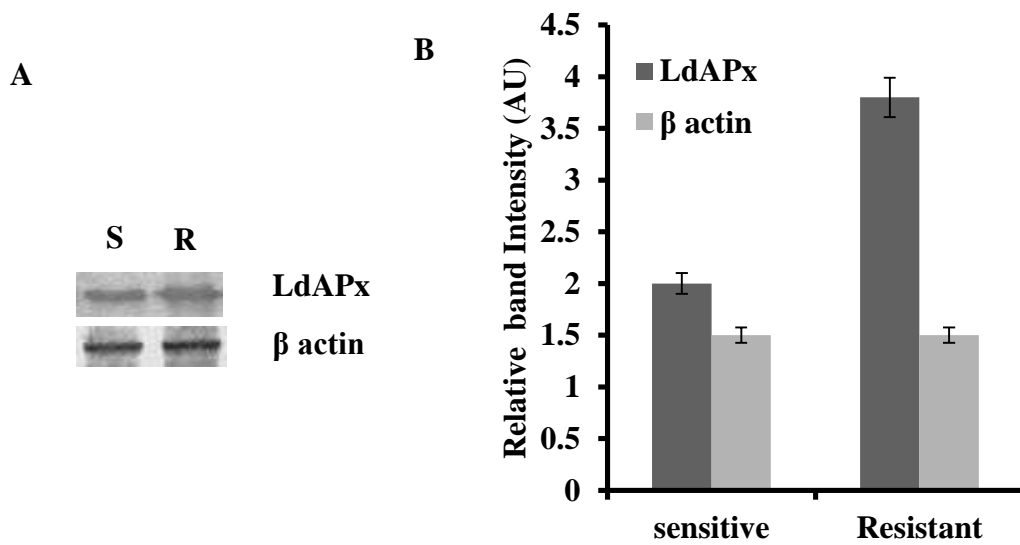

Fig S3: (A) Western blot analysis for expression level of ascorbate peroxidase in sensitive (S) and resistant (R) isolates of *Leishmania donovani*. (B) Densitometric analysis of bands shows ~2.1 fold upregulation in resistant strain compared to sensitive.
